# Supplementary material
Source: bioRxiv or medRxiv preprint supplement (https://medrxiv.org/highwire/filestream/83428/field_highwire_adjunct_files/6/2020.05.26.20113902-7.pdf)

## Healthy Blood

### Adaptive immunity

CD3+ T cells: ~28%

CD4+ T cells: ~20%

CD8+ T cells: ~8%

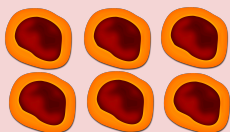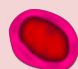

Recently-activated  
HLA-DR+ T cells

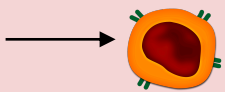

Recently-activated  
plasmablasts

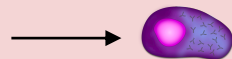

### Innate immunity

Granulocytes: ~60%

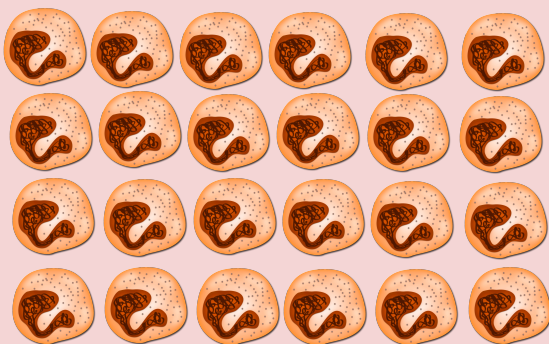

Monocytes: ~4%

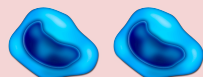

NK cells: ~3.2%

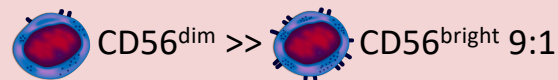

DC: ~0.8%

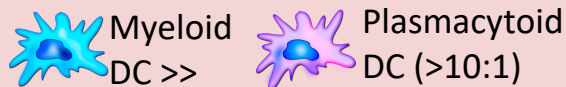

## Healthy cerebrospinal fluid

### Adaptive immunity

CD3+ T cells: ~70% ↑↑

CD4+ T cells: ~50% ↑↑

↑CD4/CD8 ratio

CD8+ T cells: ~20% ↑

CD19+ B cells: <3%

### Innate immunity

Granulocytes: <5% ↓↓

Monocytes: >20% ↑

NK cells: ~5%

DC: ~3% ↑

HLA-DR+ T cells ↑↑

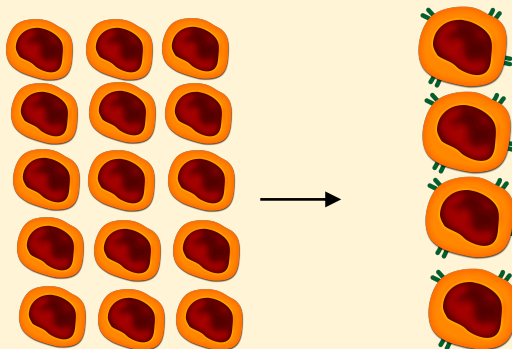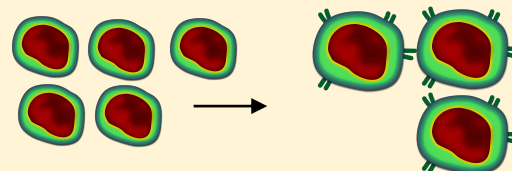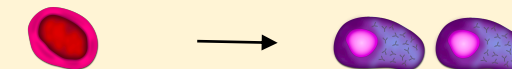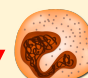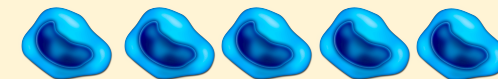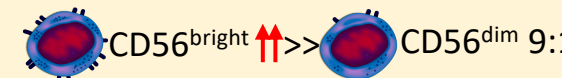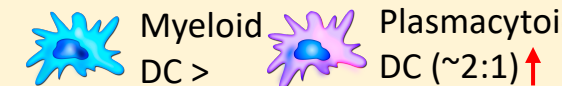

Plasmablasts ↑

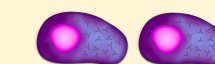

Myeloid DC > Plasmacytoid DC (~2:1) ↑

# Healthy aging Blood

## Adaptive immunity

↑ CD3+ T cells: ~28% ↑

↑ CD4+ T cells: >20% ↑

CD8+ T cells: ~8%

CD19+ B cells: <4%

## Innate immunity

Granulocytes: ~60%

Monocytes: ~4%

↑ NK cells: ~3.2%

DC: ~0.8%

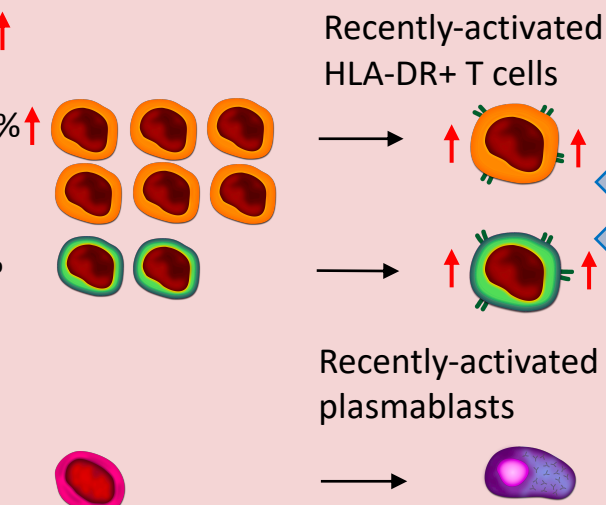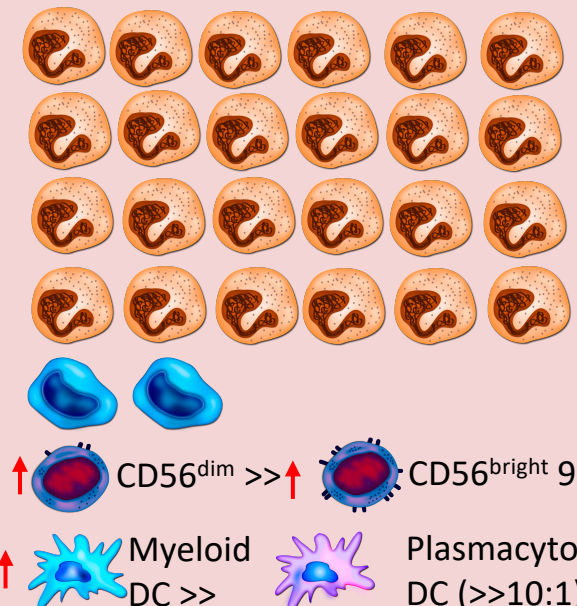

# Healthy aging cerebrospinal fluid

## Adaptive immunity

CD3+ T cells: ~70%

CD4+ T cells: >50% ↑

HLA-DR+ CD4 T cells  
HLA-DR+ CD8 T cells  
CSF/blood ratios  
decrease with age

CD8+ T cells: ~20%

CD19+ B cells: <3%

## Innate immunity

Granulocytes: <5%

Monocytes: >20%

NK cells: ~5%

DC: ~3%

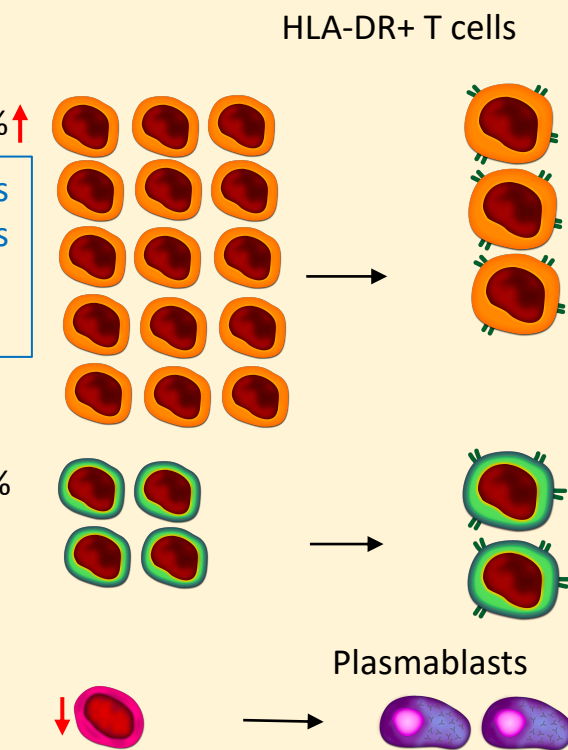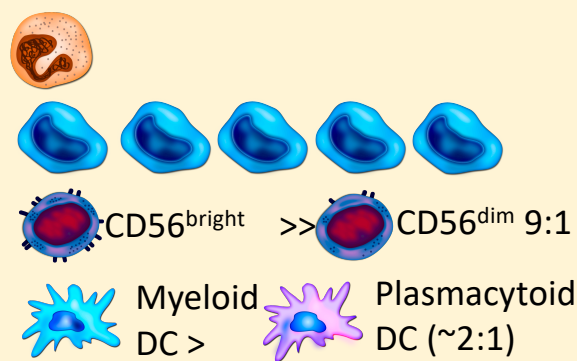

# Healthy gender effects: Blood

## Adaptive immunity

CD3+ T cells: ~28%

CD4+ T cells: ~20%

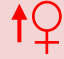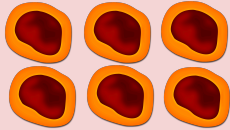

Recently-activated  
HLA-DR+ T cells

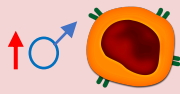

CD8+ T cells: ~8%

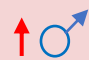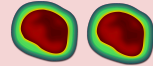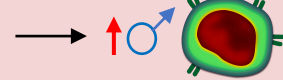

Recently-activated  
plasmablasts

CD19+ B cells: ~4%

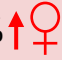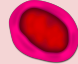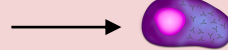

## Innate immunity

Granulocytes: ~60%

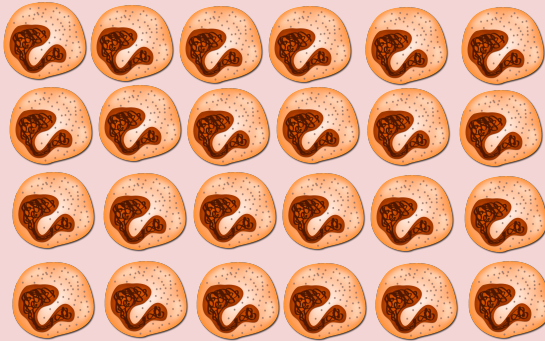

Monocytes: ~4%

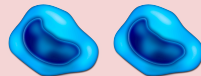

NK cells: ~3.2%

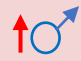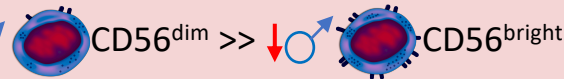

DC: ~0.8%

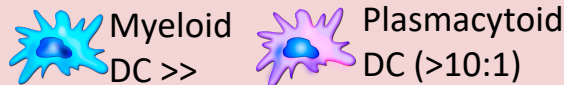

# Healthy gender effects: CSF

## Adaptive immunity

CD3+ T cells: ~70%

CD4+ T cells: ~50%

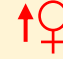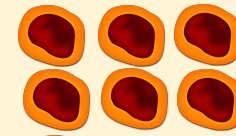

HLA-DR+ T cells

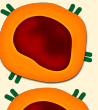

CD4/CD8 ratio

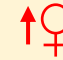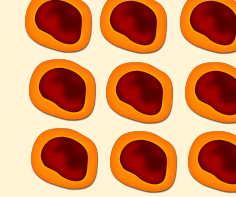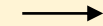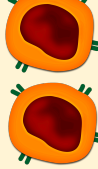

CD8+ T cells: ~20%

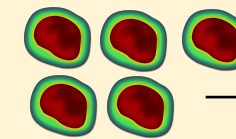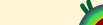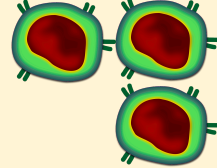

Plasmablasts

CD19+ B cells: <3%

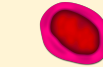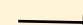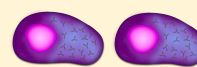

## Innate immunity

Granulocytes: <5%

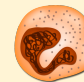

Monocytes: >20%

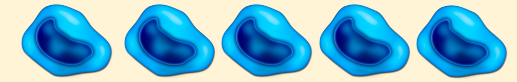

NK cells: ~5%

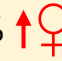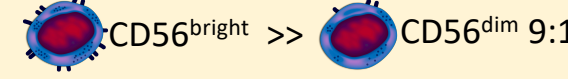

DC: ~3%

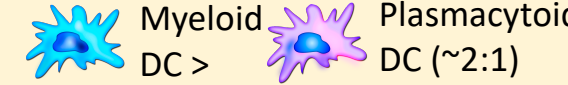

# RR-MS Blood

# CSF/Blood ratios

# RR-MS cerebrospinal fluid

## Adaptive immunity

CD3+ T cells: ~28%

CD4+ T cells: >20% ↑

CD8+ T cells: ~8%

CD19+ B cells: ~4%

## Innate immunity

Granulocytes: ~60%

Monocytes: ~4%

NK cells: ~3.2%

DC: ~0.8%

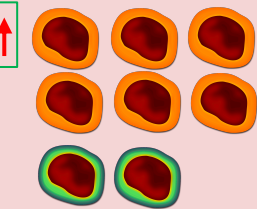

Recently-activated HLA-DR+ T cells

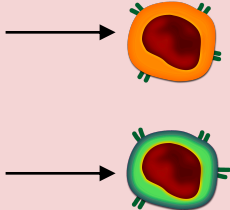

Recently-activated plasmablasts

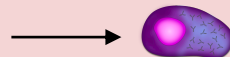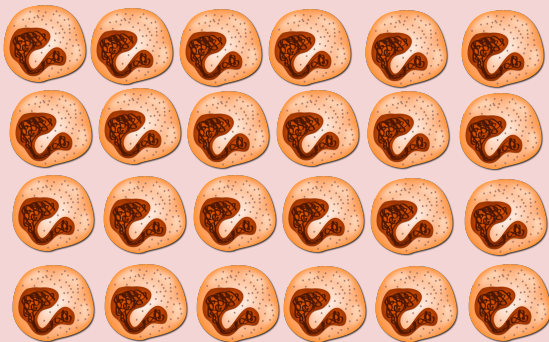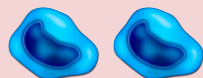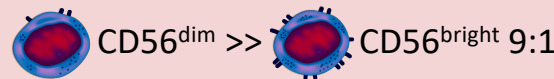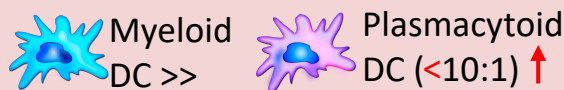

## Adaptive immunity

CD3+ T cells: >70% ↑↑

CD4+ T cells: >50% ↑↑

CD8+ T cells: ~20%

CD19+ B cells: >3% ↑↑

## Innate immunity

Granulocytes: <5%

Monocytes: <20% ↓↓

NK cells: ~5%

DC: ~3%

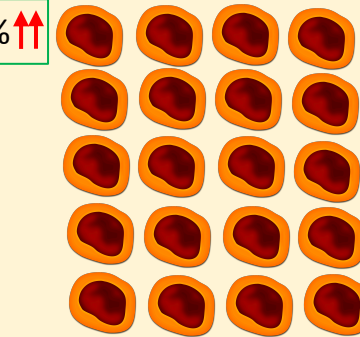

HLA-DR+ T cells

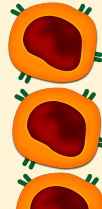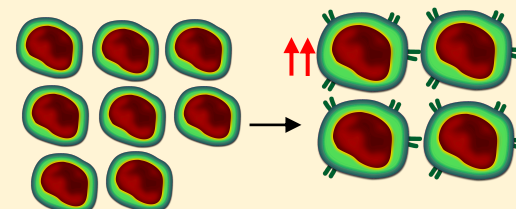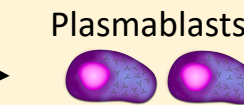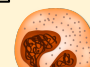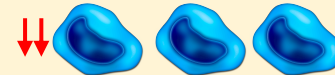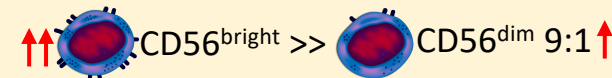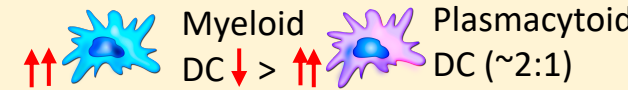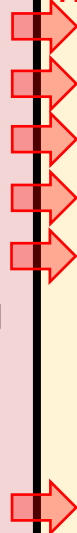

# Progressive MS Blood

## CSF/Blood ratios

# Progressive MS CSF

### Adaptive immunity

CD3+ T cells: <28% ↓↓

CD4+ T cells: >20% ↑

CD4/CD8 ratio ↑

CD8+ T cells: ~8% ↓

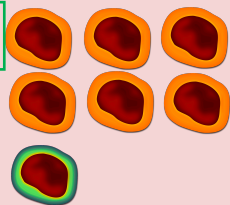

Recently-activated HLA-DR+ T cells

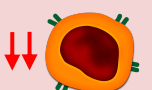

Recently-activated Plasmablasts

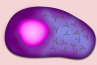

CD19+ B cells: ~4%

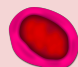

### Innate immunity

Granulocytes: ~60%

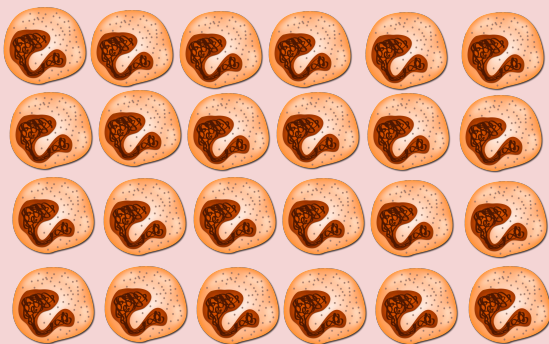

Monocytes: ~4%



↓ NK cells: ~3.2%

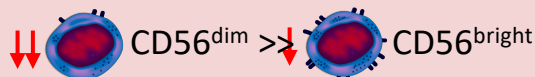

DC: ~0.8%

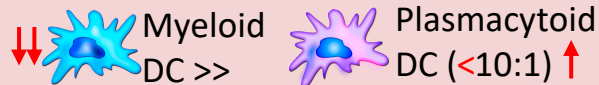

### Adaptive immunity

↑ CD3+ T cells: >70% ↑

↑ CD4+ T cells: ~50%

CD4/CD8 ratio

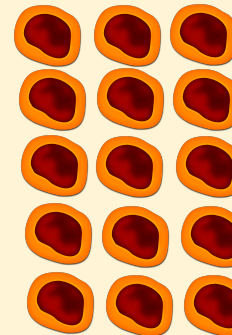

HLA-DR+ T cells

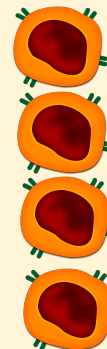

↑ CD8+ T cells: ~20%

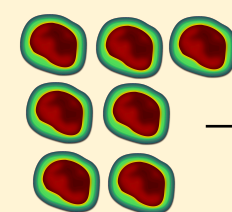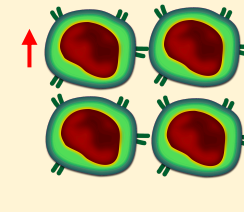

↑↑ CD19+ B cells: >3% ↑↑

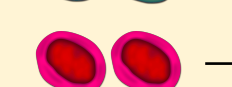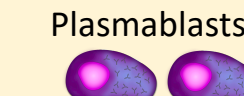

### Innate immunity

Granulocytes: <5%

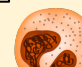

Monocytes: <20% ↓

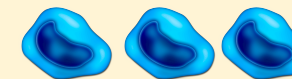

↑↑ NK cells: ~5%

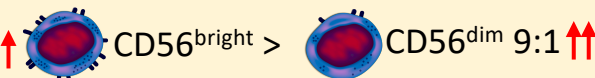

DC: ~3%

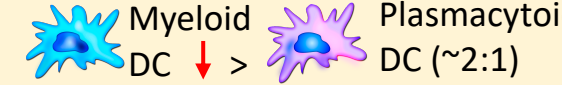



# IFN-beta vs untreated Blood

CSF/Blood ratios

# IFN-beta vs untreated CSF

## Adaptive immunity

CD3+ T cells: ~28%

Recently-activated  
HLA-DR+ T cells

CD4+ T cells: ~20%

CD8+ T cells: ~8%

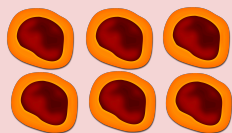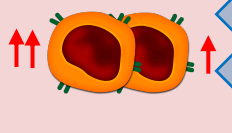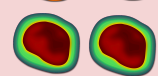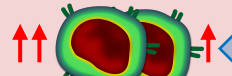

CD19+ B cells: ~4%

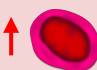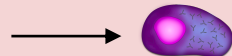

## Innate immunity

Granulocytes: ~60%

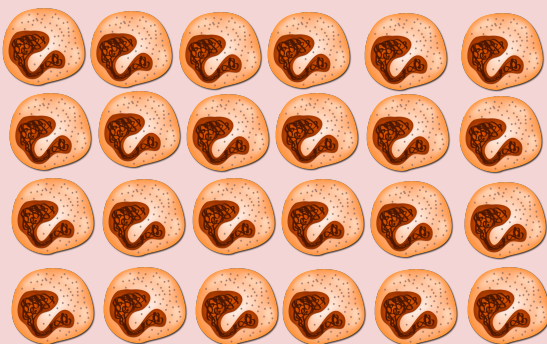

Monocytes: ~4%

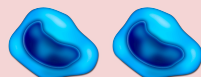

NK cells: ~3.2%

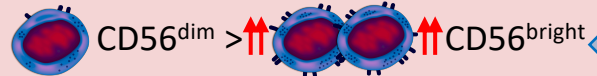

DC: ~0.8%

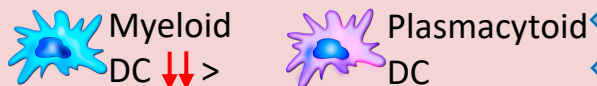

## Adaptive immunity

CD3+ T cells: >70%

CD4+ T cells: >50%

CD8+ T cells: ~20%

HLA-DR+ T cells

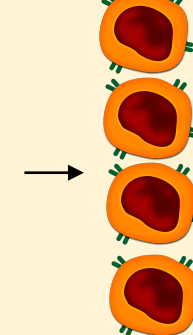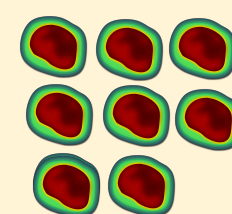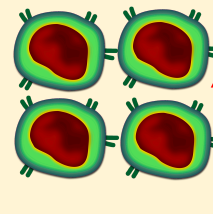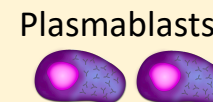

## Innate immunity

Granulocytes: <5%

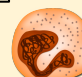

Monocytes: <20%

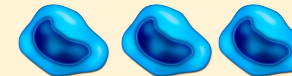

NK cells: ~5%

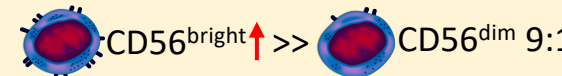

DC: ~3%

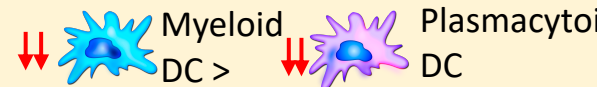

# Glatiramer vs untreated: Blood

CSF/Blood ratios

# Glatiramer vs untreated: CSF

## Adaptive immunity

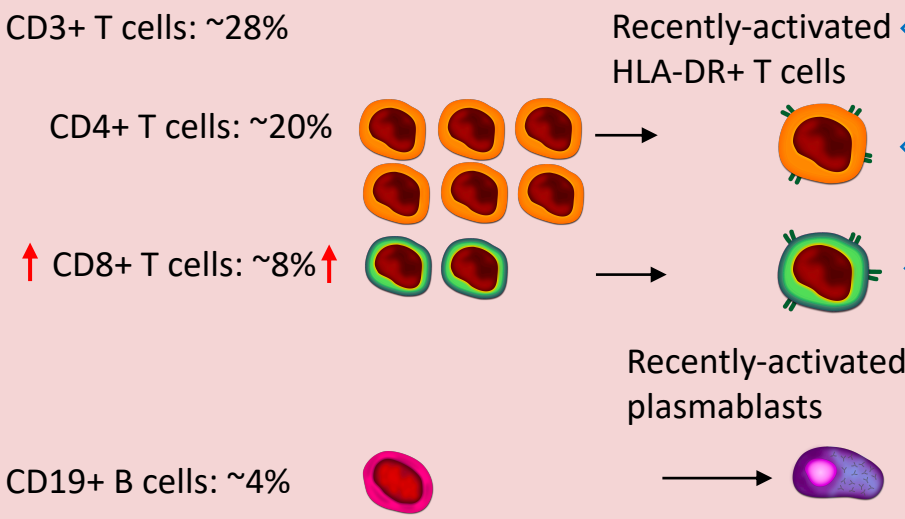

## Adaptive immunity

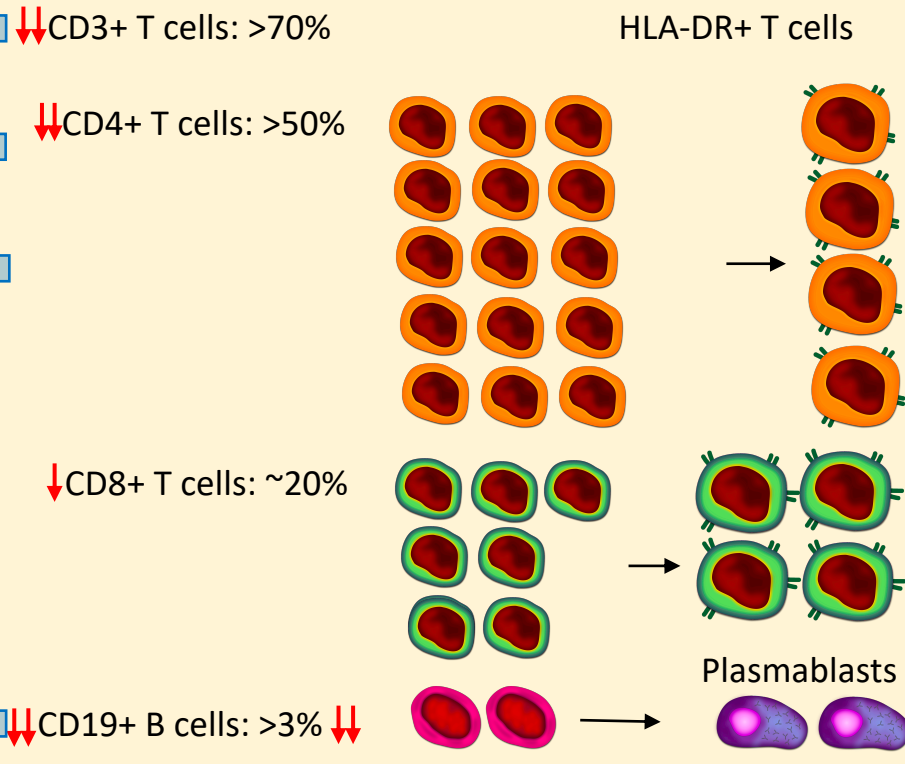

## Innate immunity

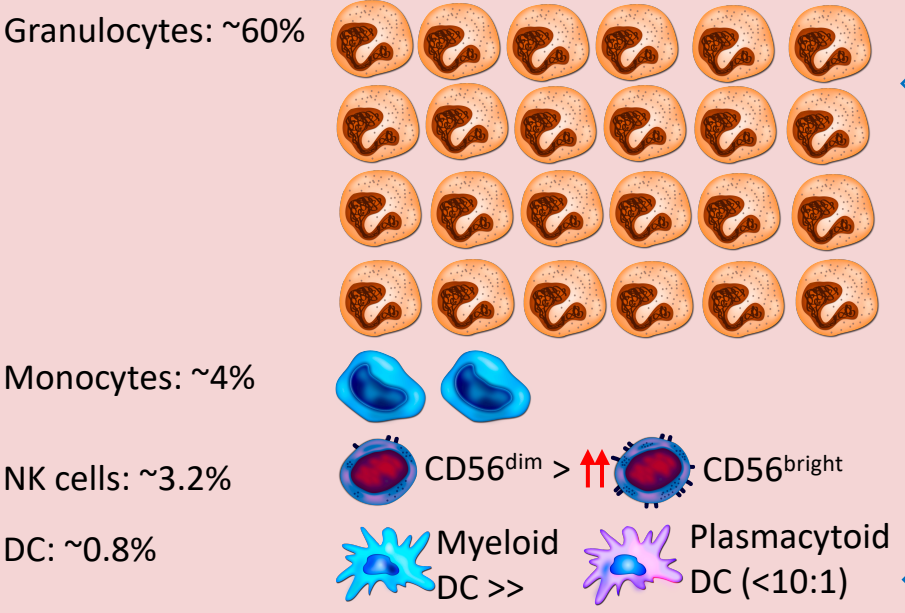

## Innate immunity

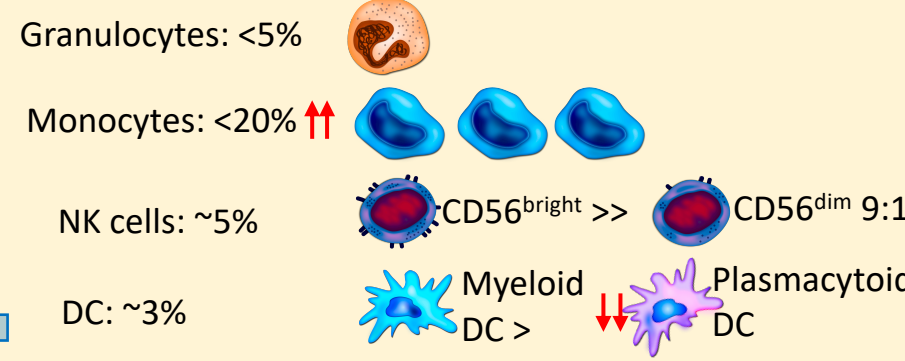

# Natalizumab vs untreated: Blood

## CSF/Blood ratios

# Natalizumab vs untreated: CSF

### Adaptive immunity

↑↑ CD3+ T cells: ~28%

↑↑ CD4+ T cells: ~20%

↑↑ CD8+ T cells: > 8%

Recently-activated HLA-DR+ T cells

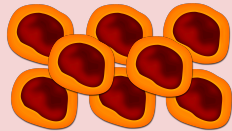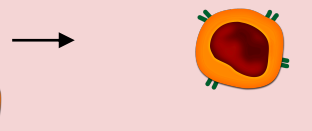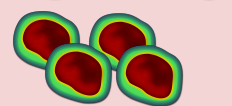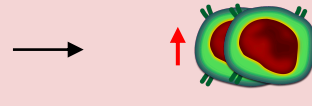

Recently-activated plasmablasts

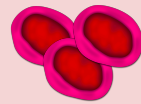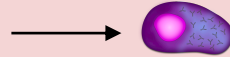

↑↑ CD19+ B cells: > 4%

### Innate immunity

Granulocytes: ~60%

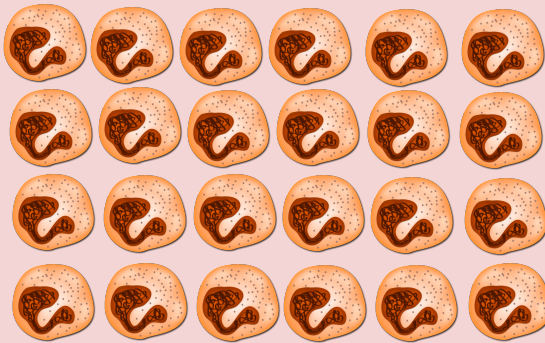

Monocytes: < 4%

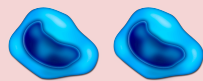

↑↑ NK cells: ~3.2%

↑↑ CD56<sup>dim</sup> > ↑ CD56<sup>bright</sup> < 9:1

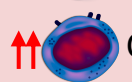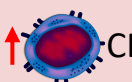

DC: ~0.8%

↑↑ Myeloid DC >>>

↓ Plasmacytoid DC (<10:1)

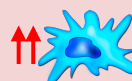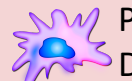

### Adaptive immunity

↓↓ CD3+ T cells: >70%

↓↓ CD4+ T cells: < 50%

↓↓ CD4/CD8 ratio

CD8+ T cells: >20%

HLA-DR+ T cells

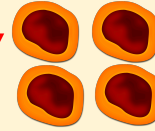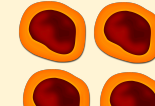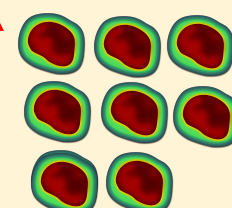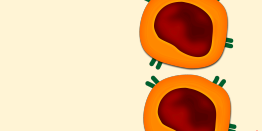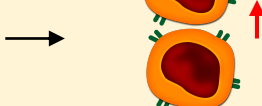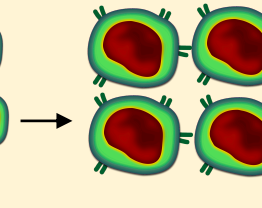

Plasmablasts

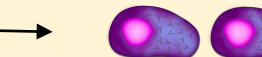

↓↓ CD19+ B cells: >3%

### Innate immunity

Granulocytes: < 5%

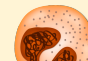

Monocytes: < 20%

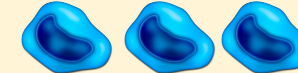

↓↓ NK cells: ~5%

↓↓ CD56<sup>bright</sup> >>> ↓ CD56<sup>dim</sup>

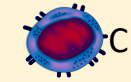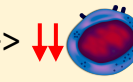

DC: ~3%

↑↑ Myeloid DC >

↓ Plasmacytoid DC (~2:1)

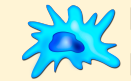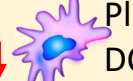



# Daclizumab vs untreated: Blood

CSF/Blood ratios

# Daclizumab vs untreated: CSF

## Adaptive immunity

↓↓ CD3+ T cells: ~28% ↓↓

↓↓ CD4+ T cells: ~20% ↓↓

↓↓ CD8+ T cells: ~8%

Recently-activated HLA-DR+ T cells

Recently-activated plasmablasts

↓↓ CD19+ B cells: ~4%

## Innate immunity

Granulocytes: ~60%

Monocytes: >4% ↑↑

↑↑ NK cells: ~3.2%

DC: ~0.8%

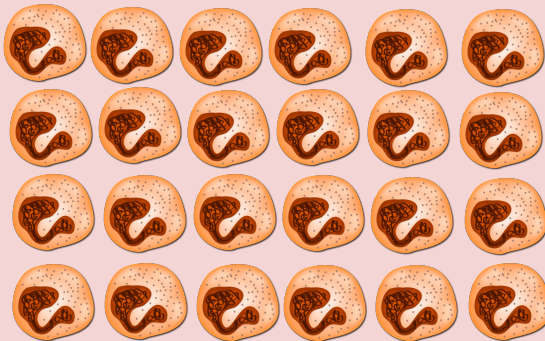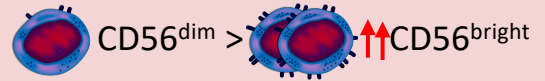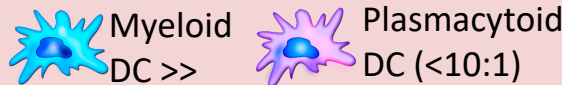

## Adaptive immunity

↓↓ CD3+ T cells: >70% ↓↓

↓↓ CD4+ T cells: >50%

↓↓ CD8+ T cells: ~20% ↑↑

↓↓ CD19+ B cells: <3%

## Innate immunity

Granulocytes: <5%

Monocytes: <20% ↑

NK cells: ~5% ↑↑

DC: ~3%

HLA-DR+ T cells

Plasmablasts

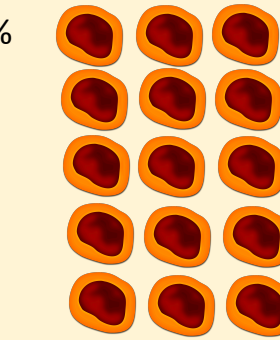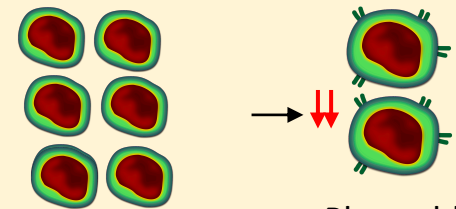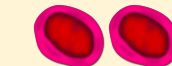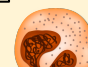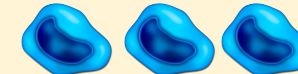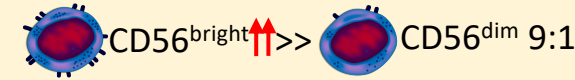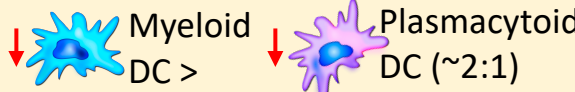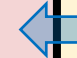

# Ocrelizumab vs untreated: Blood

## CSF/Blood ratios

# Ocrelizumab vs untreated: CSF

### Adaptive immunity

↑↑ CD3+ T cells: ~28%

↑↑ CD4+ T cells: ~20%

↑↑ CD8+ T cells: ~8%

↓↓ CD19+ B cells: <<4%

### Innate immunity

Granulocytes: ~60%

↑↑ Monocytes: ~4%

↑↑ NK cells: ~3.2%

DC: ~0.8%

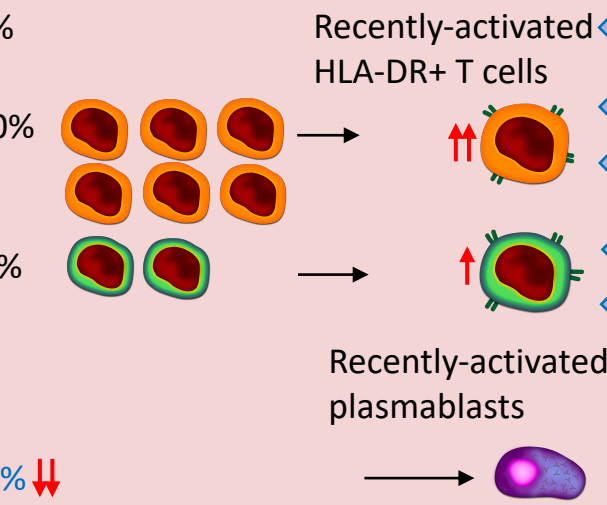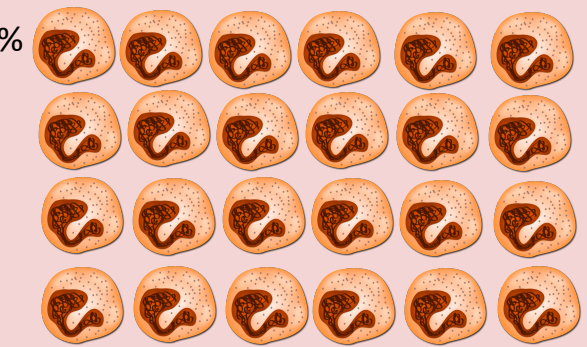

### Adaptive immunity

↓↓ CD3+ T cells: >70%

↓↓ CD4+ T cells: >50%

↓↓ CD4/CD8 ratio

↓↓ CD8+ T cells: ~20%

↓↓ CD19+ B cells: <<3%

### Innate immunity

Granulocytes: <5%

Monocytes: <20%

↓↓ NK cells: ~5%

DC: ~3%

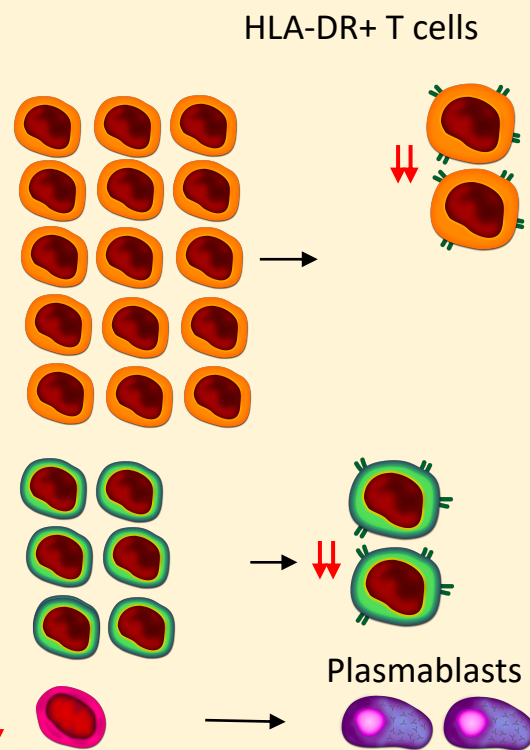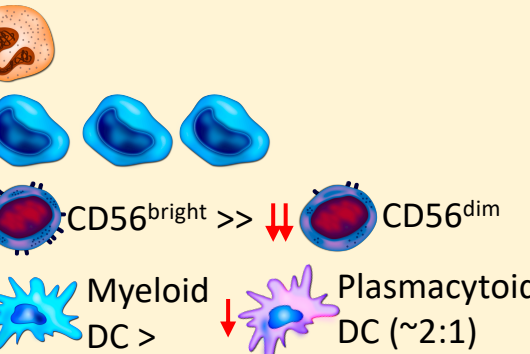

Supplement: Supplementary file [file 2020.05.26.20113902-7.pdf]
